# Supplementary material
Source: MDPI journal article supplement (https://www.mdpi.com/2227-7102/14/5/546)
Supplement: s1 [file s1]

## Supplementary Materials

**Table S1.** Teacher Self-Efficacy Scale

| Item                                                                                                                                     | Description                                                                                      |
|------------------------------------------------------------------------------------------------------------------------------------------|--------------------------------------------------------------------------------------------------|
| TSE 1                                                                                                                                    | How much can you do to control disruptive behavior in the classroom?                             |
| TSE 2                                                                                                                                    | How much can you do to motivate students who show low interest in schoolwork?                    |
| TSE 3                                                                                                                                    | How much can you do to get students to believe they can do well in schoolwork?                   |
| TSE 4                                                                                                                                    | To what extent can you craft good questions for your students?                                   |
| TSE 5                                                                                                                                    | How well can you establish a classroom management system with each group of students?            |
| TSE 6                                                                                                                                    | How much can you use a variety of assessment strategies?                                         |
| TSE 7                                                                                                                                    | To what extent can you provide an alternative explanation or example when students are confused? |
| TSE 8                                                                                                                                    | How much can you assist families in helping their students do well in school?                    |
| TSE 9                                                                                                                                    | How well can you implement alternative strategies in your classroom?                             |
| <i>New TSE Items: Beliefs about Culturally Relevant Teaching, Transformative Teaching, and Developmental Relationships with Students</i> |                                                                                                  |
| TSE 10                                                                                                                                   | How well can you recognize differences among students' cultures?                                 |
| TSE 11                                                                                                                                   | How well can you identify similarities and differences between your and your students' culture?  |
| TSE 12                                                                                                                                   | To what extent can you incorporate students' culture into daily instruction?                     |
| TSE 13                                                                                                                                   | To what extent can you get students of all performance levels to have high expectations?         |
| TSE 14                                                                                                                                   | How much can you do to get students to where they need to be academically?                       |
| TSE 15                                                                                                                                   | How much can you do to match your teaching to learning preferences of students?                  |
| TSE 16                                                                                                                                   | To what extent can you develop instructional examples that are culturally familiar to students?  |
| TSE 17                                                                                                                                   | How much can you do to learn about what is important to individual students?                     |
| TSE 18                                                                                                                                   | How much can you do to learn about the different communication styles of your students?          |
| TSE 19                                                                                                                                   | How much can you do to maintain a personal connection with your students?                        |
| TSE 20                                                                                                                                   | How well can you teach about race, racism and other sensitive topics                             |
| TSE 21                                                                                                                                   | How much can you do to influence youth to be active in their communities?                        |
| TSE 22                                                                                                                                   | To what extent can you express care to even the most challenging students?                       |
| TSE 23                                                                                                                                   | How well can you involve students in decisions that affect them in the classroom?                |
| TSE 24                                                                                                                                   | How much can you do to create opportunities for students to lead?                                |
| TSE 25                                                                                                                                   | How much can you do to get students to take charge of their education?                           |
| TSE 26                                                                                                                                   | How much can you do to guide students through hard situations?                                   |
| TSE 27                                                                                                                                   | To what extent can you have student-initiated learning activities in your classroom?             |
| TSE 28                                                                                                                                   | How much can you do to promote understanding between different student groups?                   |

**Table S2. Collective Teacher Efficacy (CTE) Scale**

| Item   | Description                                                                                                 |
|--------|-------------------------------------------------------------------------------------------------------------|
| CTE 1  | How much can teachers in your school do to produce student learning?                                        |
| CTE 2  | How much can your school do to get students to believe they can do well in school?                          |
| CTE 3  | To what extent can teachers in your school make expectations clear about appropriate student behavior?      |
| CTE 4  | To what extent can school personnel in your school establish rules and procedures that facilitate learning? |
| CTE 5  | How much can teachers in your school do to promote deep understanding of academic concepts?                 |
| CTE 6  | How much can school personnel in your school do to control disruptive behavior?                             |
| CTE 7  | How much can teachers in your school do to help students think critically?                                  |
| CTE 8  | How well can adults in your school get students to follow school rules?                                     |
| CTE 9  | How much can your school do to foster student creativity?                                                   |
| CTE 10 | How much can your school do to help students feel safe while they are at school?                            |
| CTE 11 | How much can teachers do to get parents to support them?                                                    |

**Table S3. Ambitious Instruction Scale (AIS)**

| Item   | Description                                                                                                                                    |
|--------|------------------------------------------------------------------------------------------------------------------------------------------------|
| AIS 1  | Provided students opportunities to critically reflect and evaluate their pre-existing assumptions, biases and beliefs.                         |
| AIS 2  | Assigned projects or other activities that require students to analyze issues impacting their local communities.                               |
| AIS 3  | Encouraged students to consider ways they can drive change in their local community.                                                           |
| AIS 4  | Provided opportunities for students to talk about diverse perspectives from different racial and ethnic experiences.                           |
| AIS 5  | Provided curricular opportunities that encourage students to critically engage in discussions about racial oppression and white supremacy.     |
| AIS 6  | Incorporated anti-racist practices into your daily classroom instruction (including curriculum development and classroom management approach). |
| AIS 7  | Provided opportunities for students to discuss issues impacting historically marginalized groups (race, gender, class, and sexuality).         |
| AIS 8  | Assigned reading materials written by Black, Indigenous, and People of Color.                                                                  |
| AIS 9  | Invited speakers from the community to talk with your student about race or other social issues in the community.                              |
| AIS 10 | Talk about the contributions of Black and Latinx people throughout the year.                                                                   |
| AIS 11 | Used restorative justice or another inclusive approaches to school discipline.                                                                 |
| AIS 12 | Supported students with dealing with conflict.                                                                                                 |
| AIS 13 | Engaged in community-building activities with students in your classes.                                                                        |

|        |                                                                                     |
|--------|-------------------------------------------------------------------------------------|
| AIS 14 | Co-constructed behavioral expectations with your students.                          |
| AIS 15 | Provided opportunities for students to lead a project or activity.                  |
| AIS 16 | Obtained information regarding students 'academic interests.                        |
| AIS 17 | Explained new concepts using examples that are taken from students 'everyday lives. |
| AIS 18 | Encouraged students to use cross-cultural comparisons when analyzing material.      |
| AIS 19 | Identified ways students communicate at home may differ from the school norms.      |

**Table S4.** Supportive School Culture (SSC) Scale

| Item   | Description                                                                                                                    |
|--------|--------------------------------------------------------------------------------------------------------------------------------|
| SSC 1  | Makes clear to the staff his or her expectations for meeting instructional goals.                                              |
| SSC 2  | Communicates a clear vision for our school.                                                                                    |
| SSC 3  | Presses teachers to implement what they have learned in professional development.                                              |
| SSC 4  | Knows what's going on in my classroom.                                                                                         |
| SSC 5  | Participates in instructional planning with teams of teachers.                                                                 |
| SSC 6  | Provides me with useful feedback to improve my teaching.                                                                       |
| SSC 7  | Once we start a new program in this school, we follow up to make sure that it's working.                                       |
| SSC 8  | Curriculum, instruction, and learning materials are well coordinated across the different grade levels at this school.         |
| SSC 9  | There is consistency in curriculum, instruction, and learning materials among teachers in the same grade level at this school. |
| SSC 10 | The principal has confidence in the expertise of the teachers.                                                                 |
| SSC 11 | I trust the principal at his or her word.                                                                                      |
| SSC 12 | It's OK in this school to discuss feelings, worries, and frustrations with the principal.                                      |
| SSC 13 | The principal takes a personal interest in the professional development of teachers.                                           |
| SSC 14 | The principal looks out for the personal welfare of the faculty members.                                                       |
| SSC 15 | The principal at this school is an effective manager who makes the school run smoothly.                                        |
| SSC 16 | The principal places the needs of students ahead of personal and political interests.                                          |
| SSC 17 | The principal at this school is an effective manager who makes the school run smoothly.                                        |
| SSC 18 | Help maintain discipline in the entire school, not just their classroom?                                                       |
| SSC 19 | Take responsibility for improving the school?                                                                                  |
| SSC 20 | Feel responsible to help each other do their best?                                                                             |
| SSC 21 | Feel responsible that all students learn?                                                                                      |
| SSC 22 | Feel responsible for helping students develop self-control?                                                                    |

|        |                                                                               |
|--------|-------------------------------------------------------------------------------|
| SSC 23 | Feel responsible when students in this school fail?                           |
| SSC 24 | Been sustained and coherently focused, rather than short-term and unrelated.  |
| SSC 25 | Included enough time to think carefully about, try, and evaluate new ideas.   |
| SSC 26 | Been closely connected to my school's improvement plan.                       |
| SSC 27 | Included opportunities to work productively with colleagues in my school.     |
| SSC 28 | Included opportunities to work productively with teachers from other schools. |

---
